# Supplementary material
Source: PubMed Central journal article supplement (PMC5711564)

A

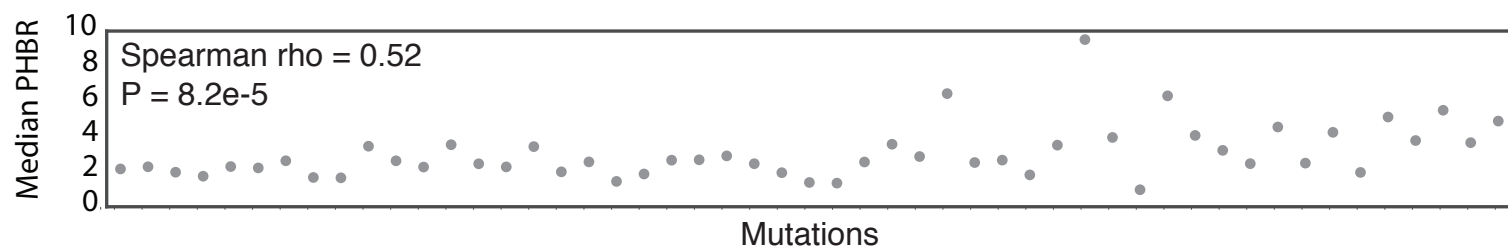

Patient  
Presentation  
Score

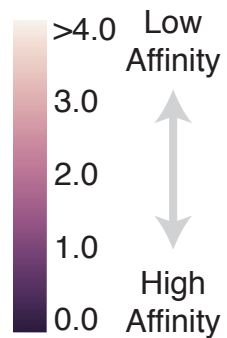

Patients

Mutation count  
in TCGA

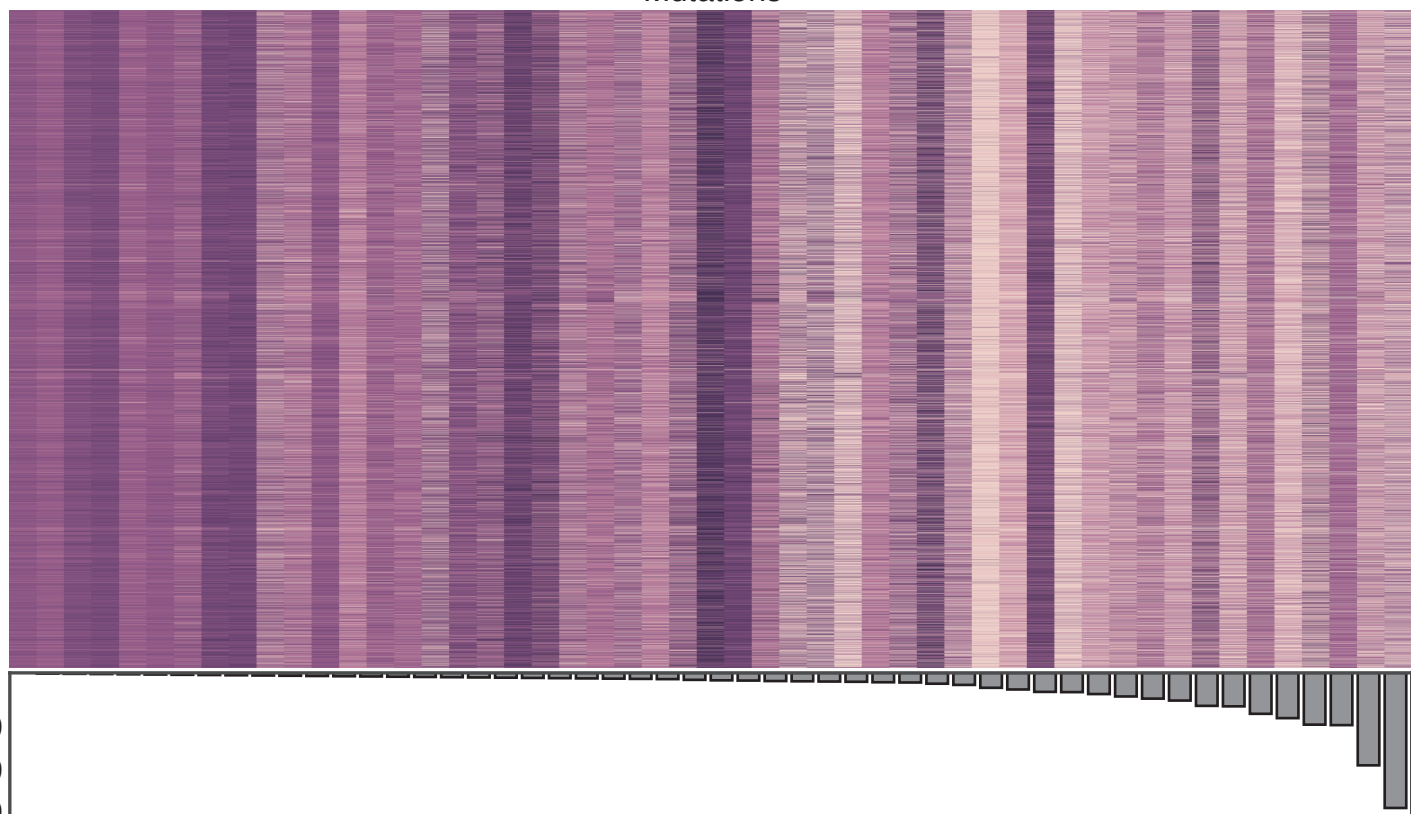

B

Tumor types  
for mutations  
with frequencies  
greater than 50%

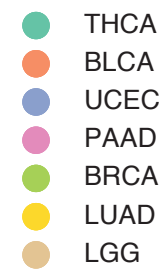

All mutations  
with frequencies  
less than 50%

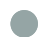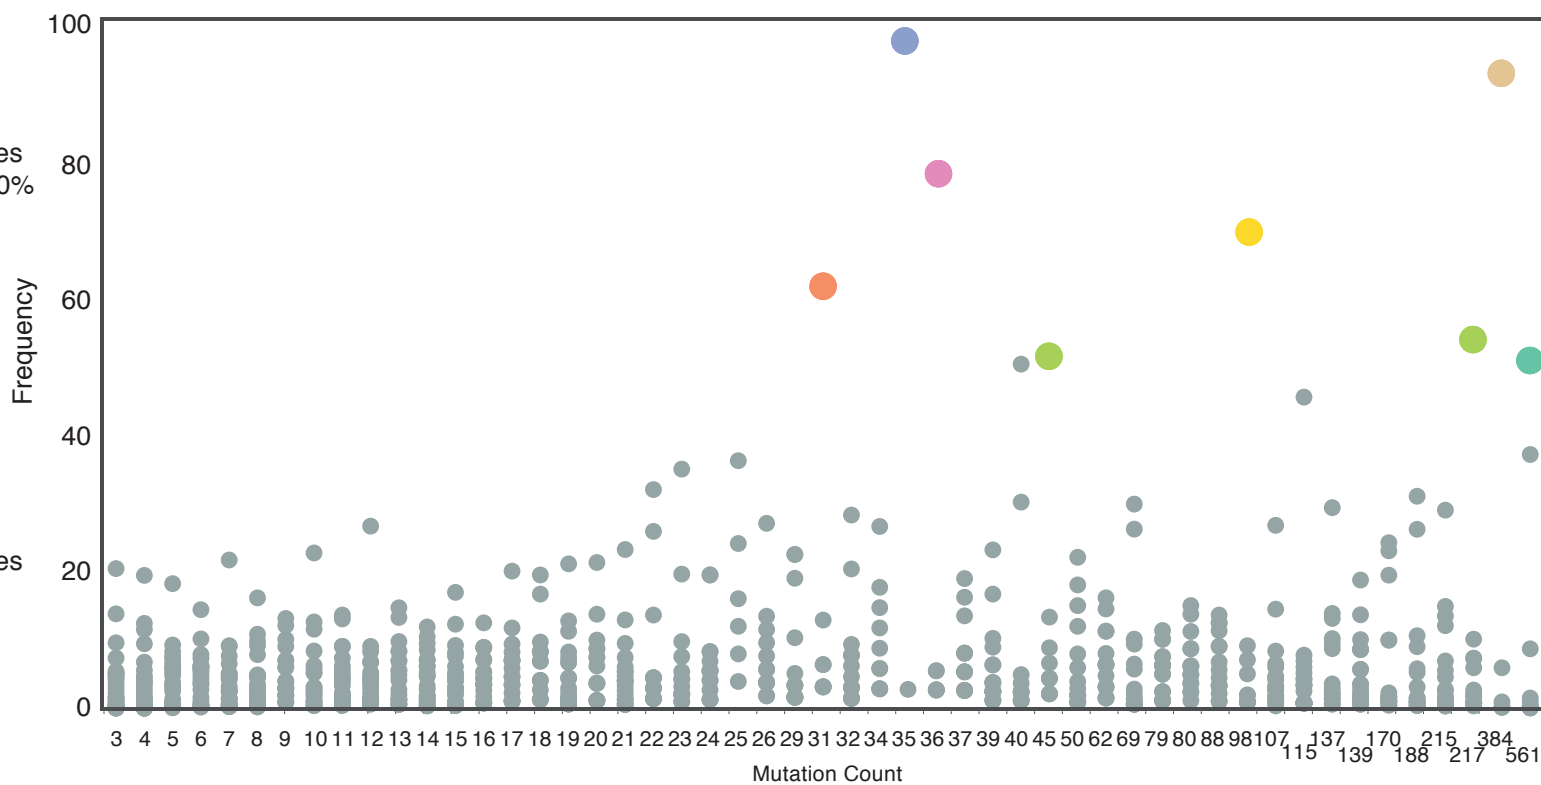

Supplement: NIHMS909948-supplement-12.pdf [file NIHMS909948-supplement-12.pdf]
