# Supplementary material
Source: PubMed Central journal article supplement (PMC5711564)

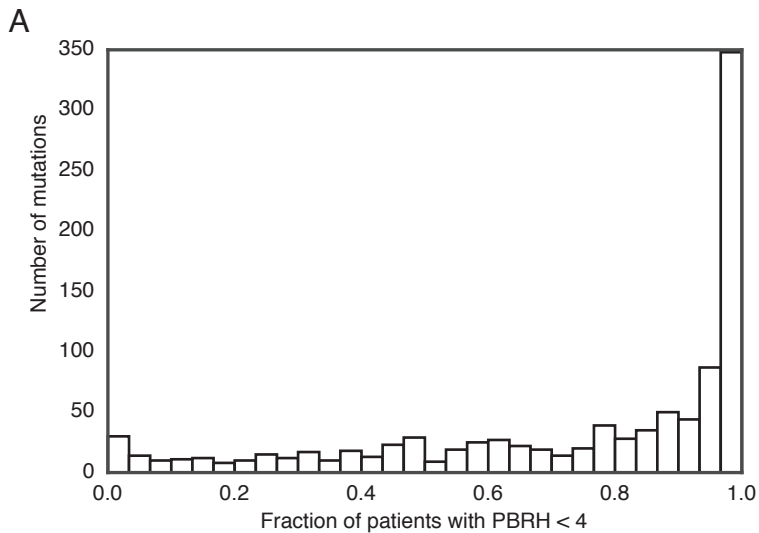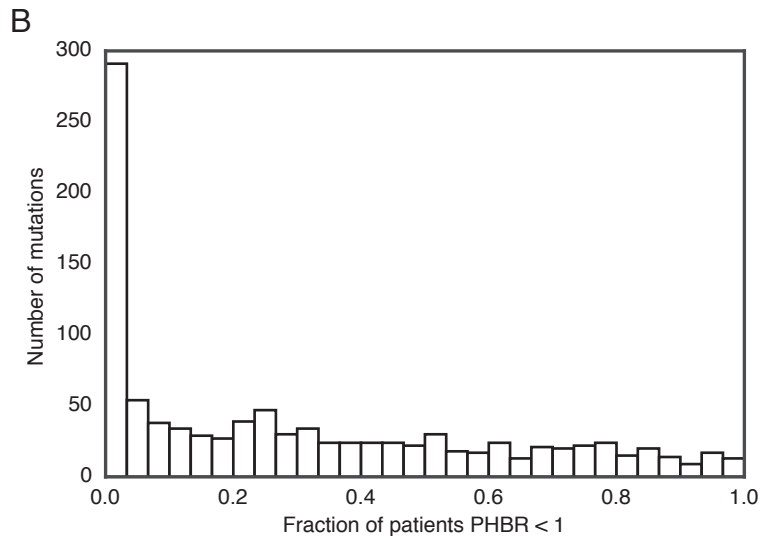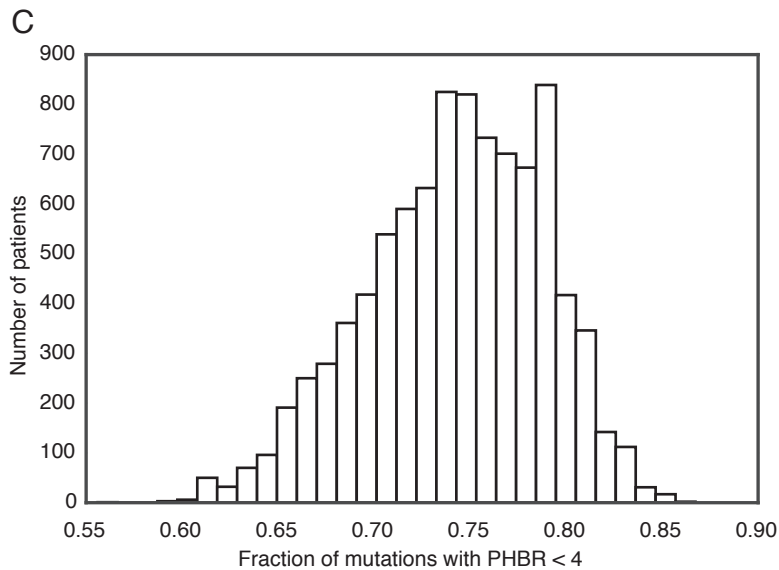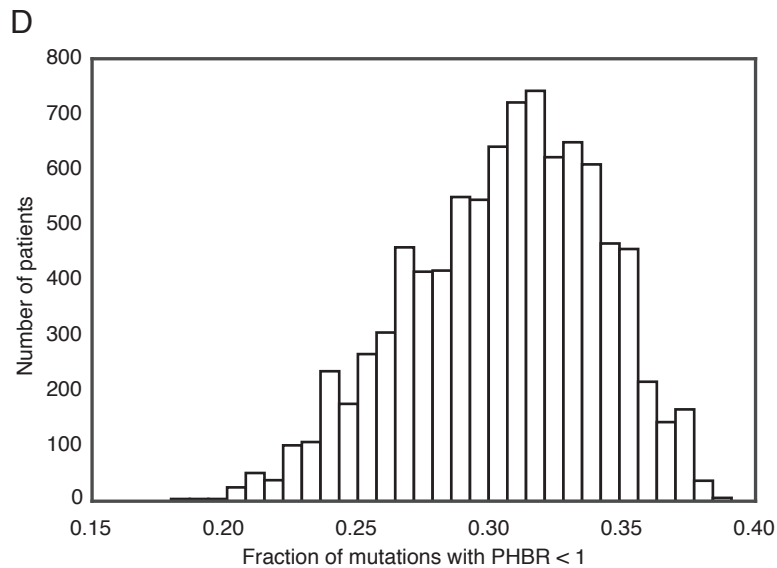

Supplement: NIHMS909948-supplement-10.pdf [file NIHMS909948-supplement-10.pdf]

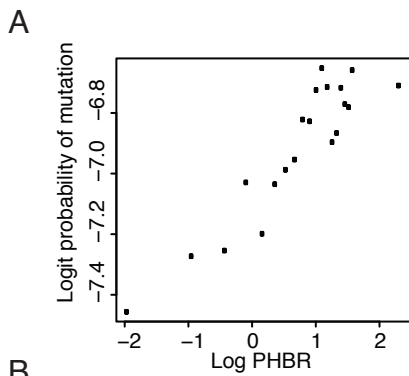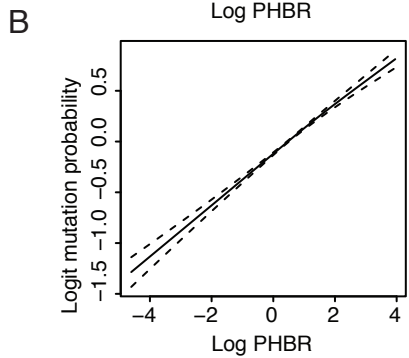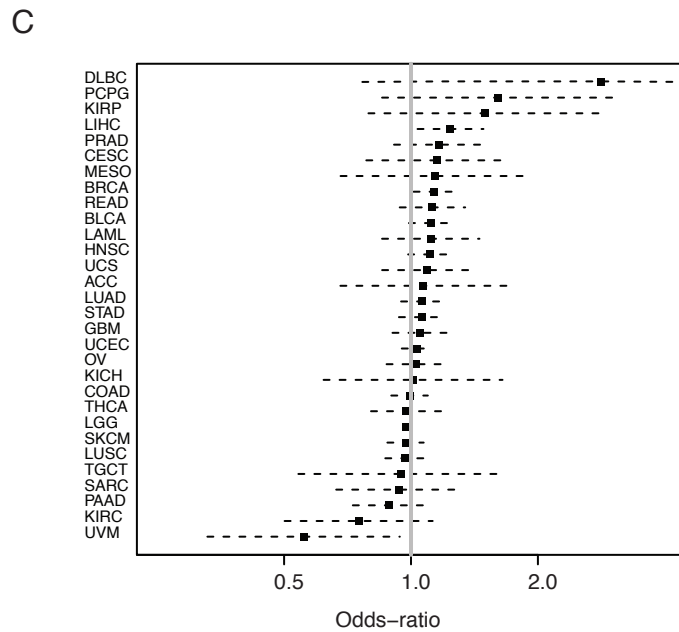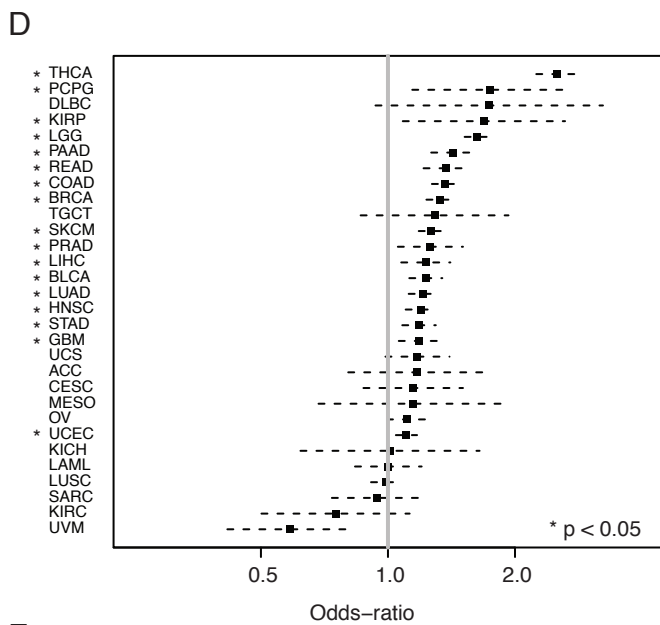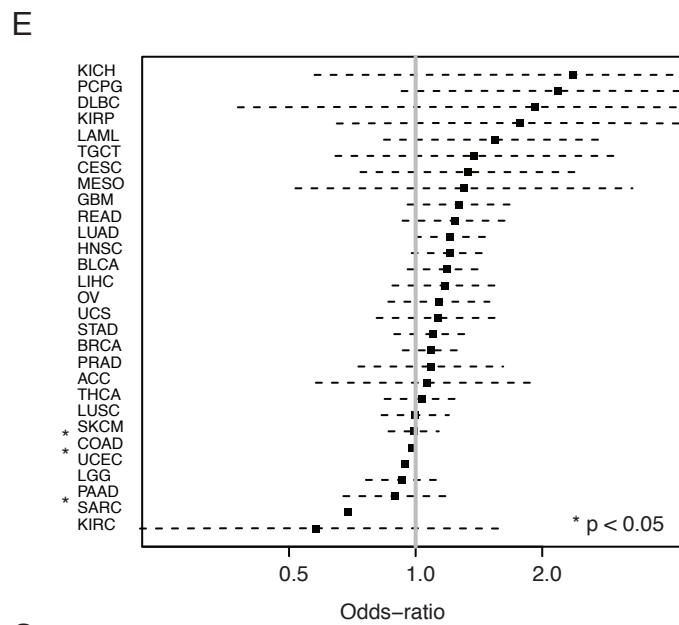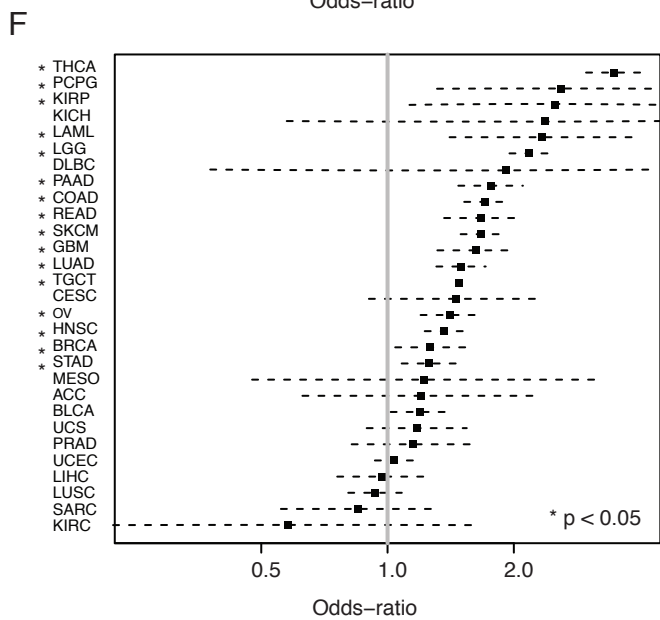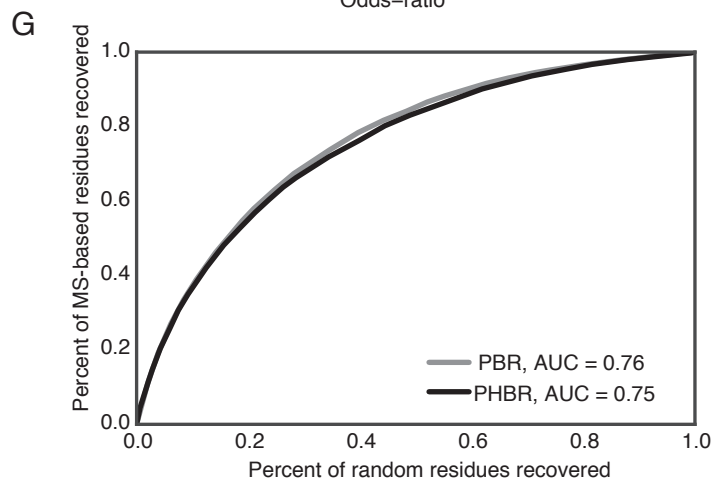

Supplement: NIHMS909948-supplement-11.pdf [file NIHMS909948-supplement-11.pdf]

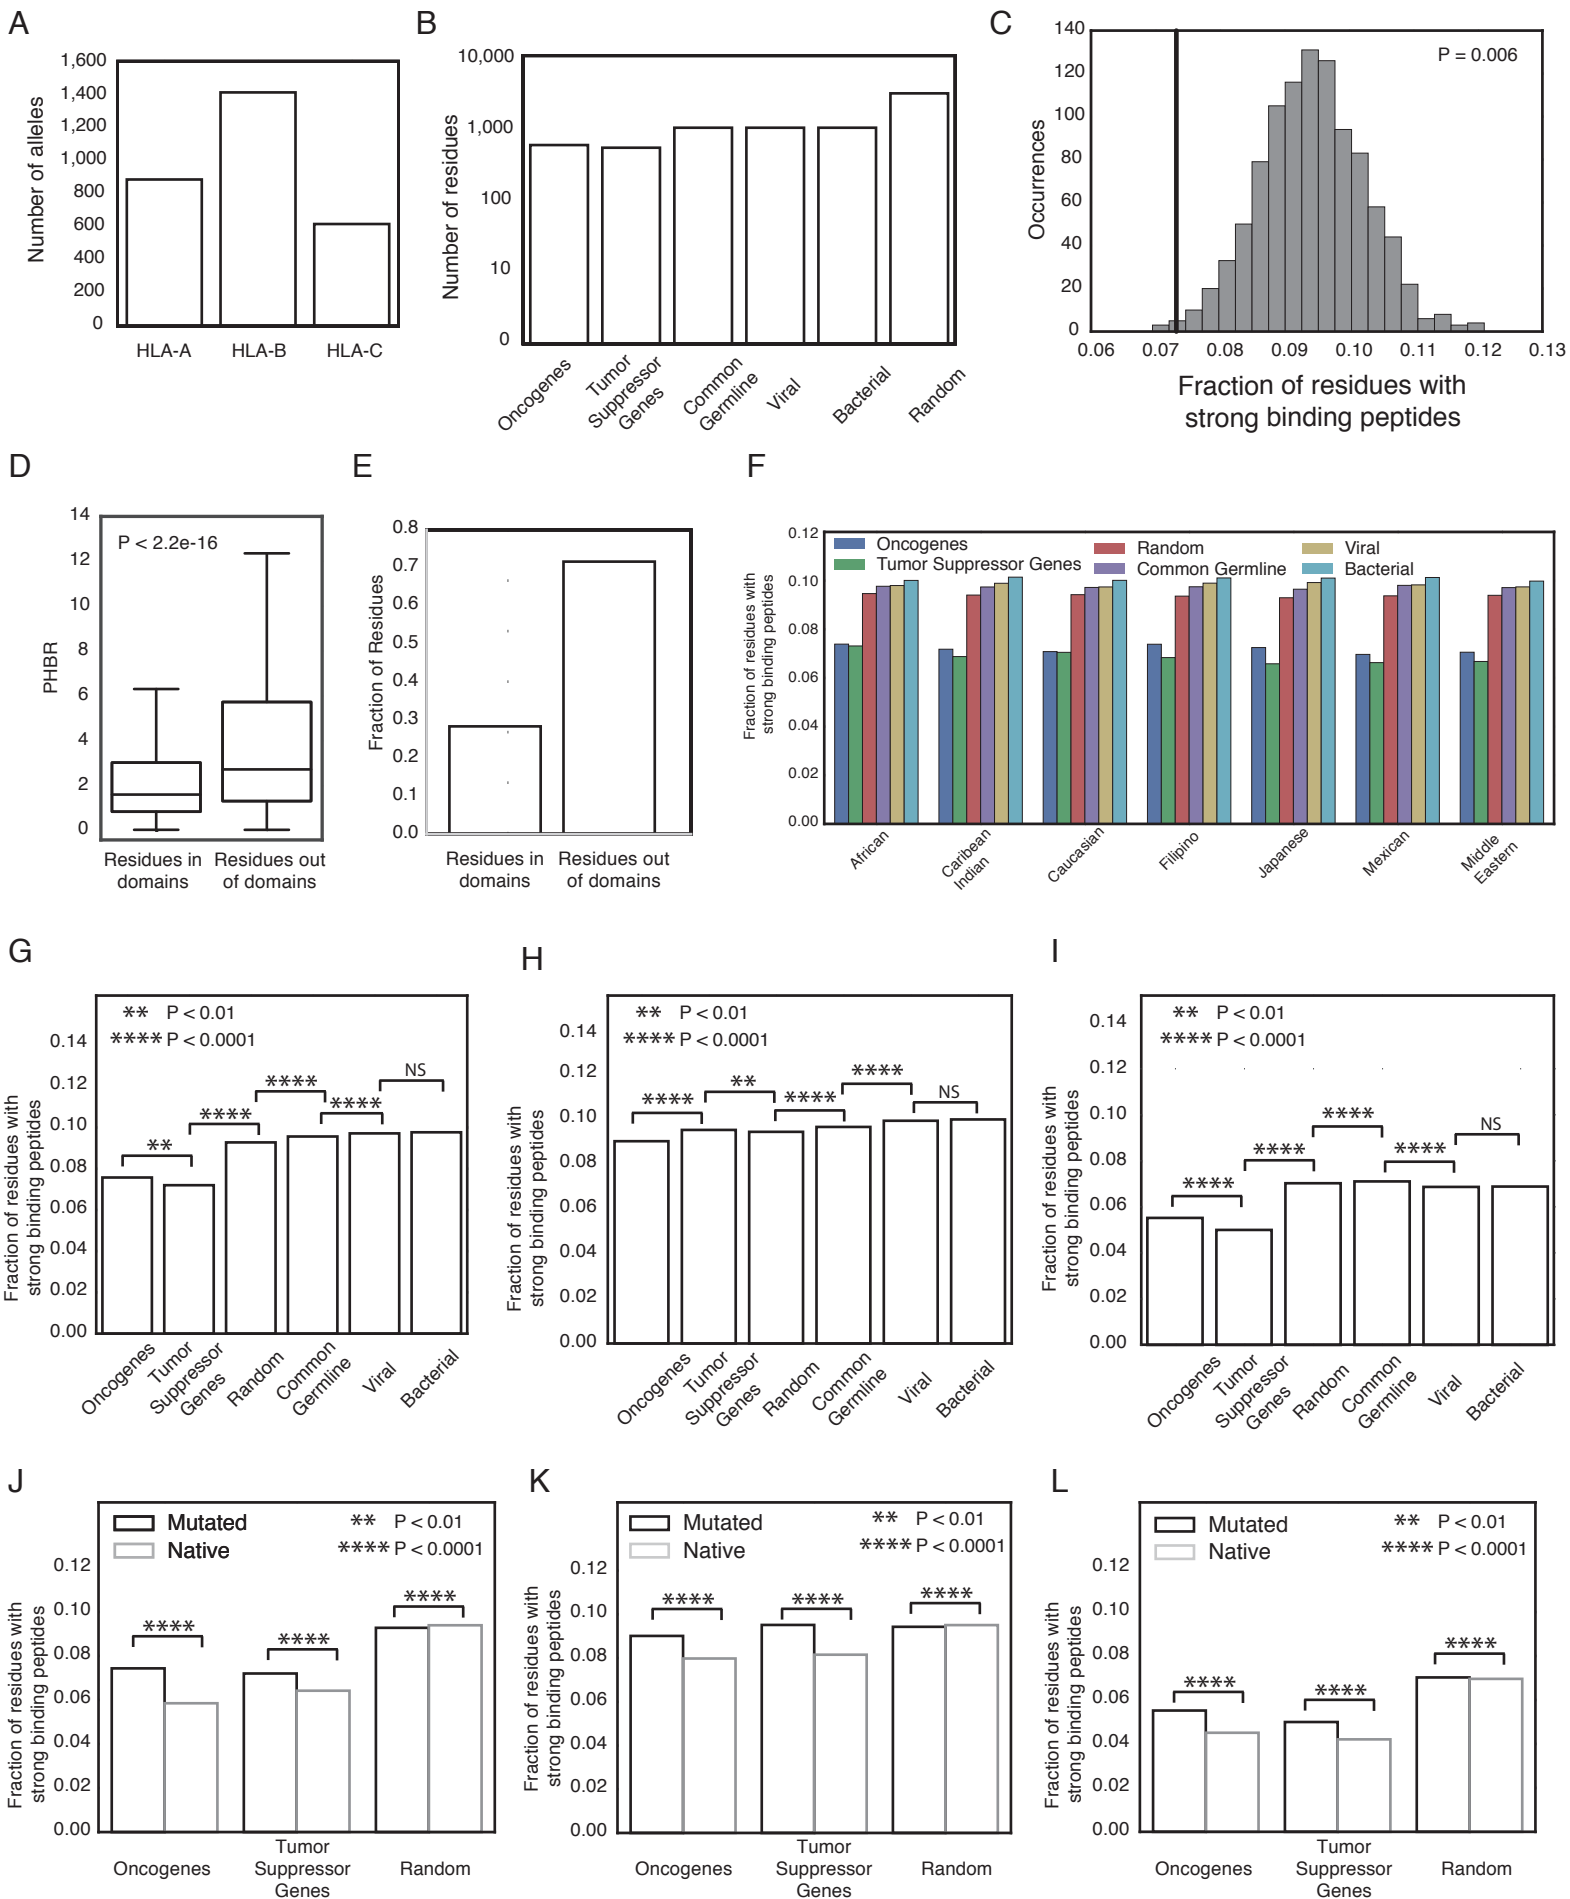

Supplement: NIHMS909948-supplement-13.pdf [file NIHMS909948-supplement-13.pdf]

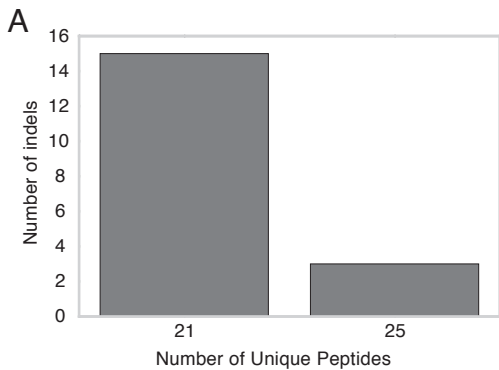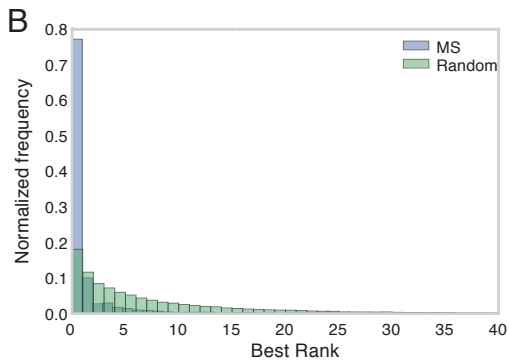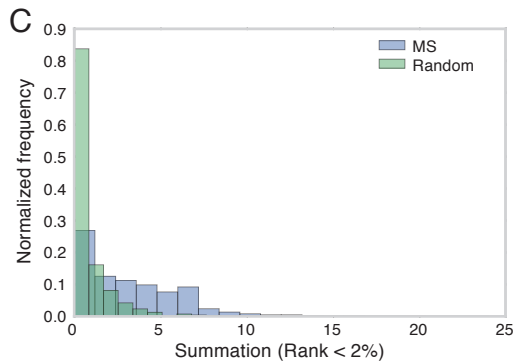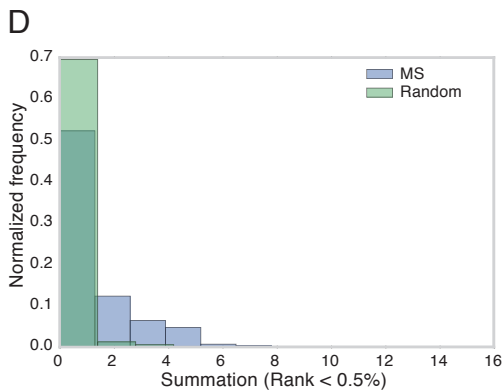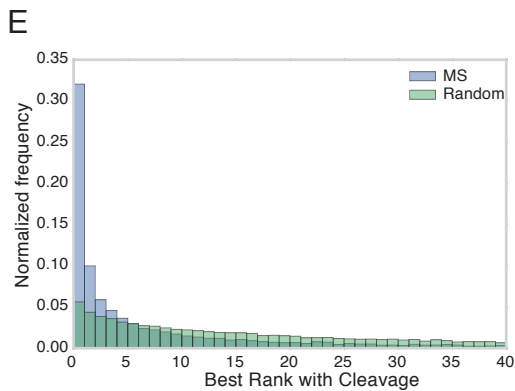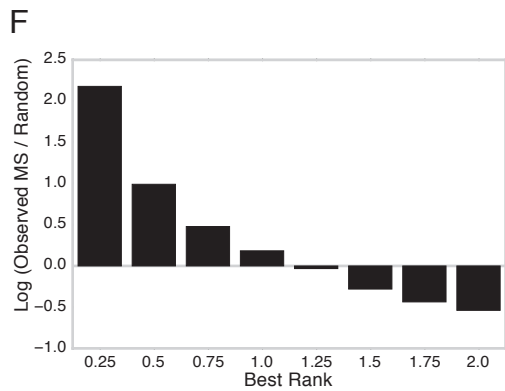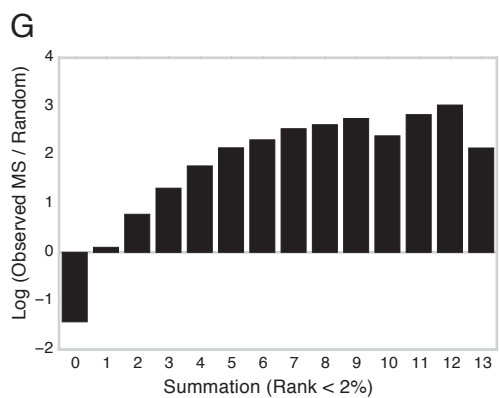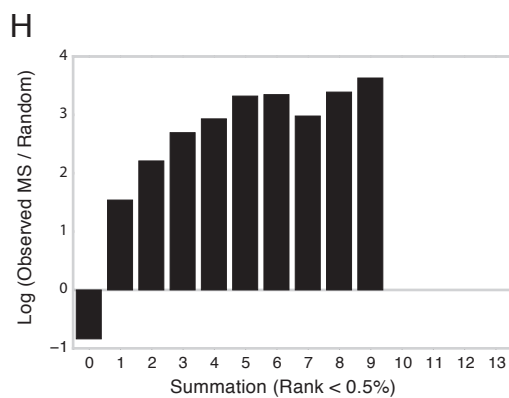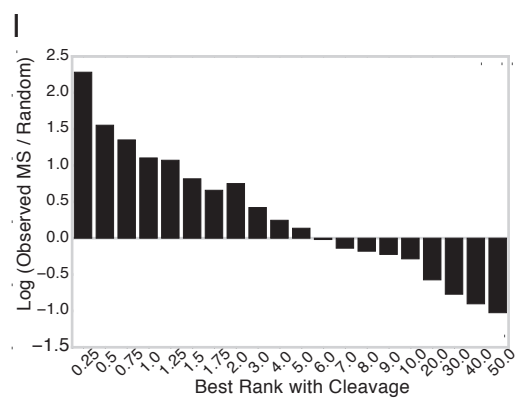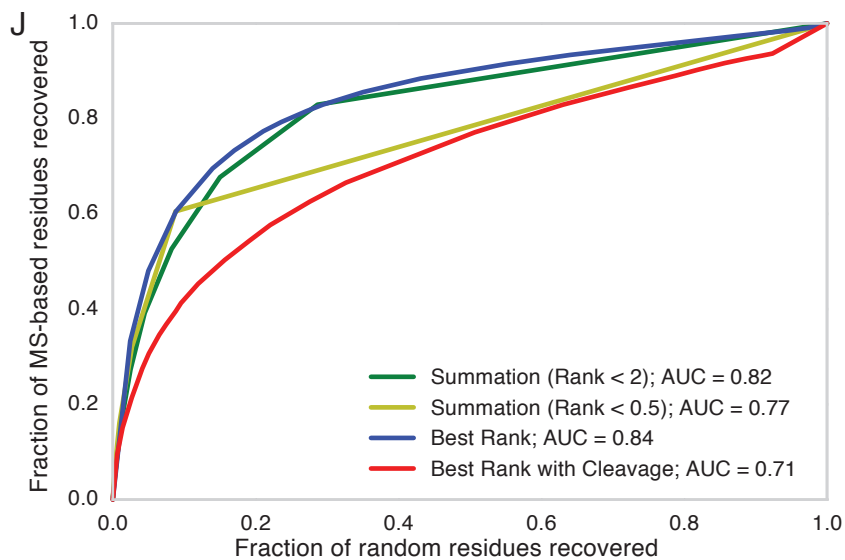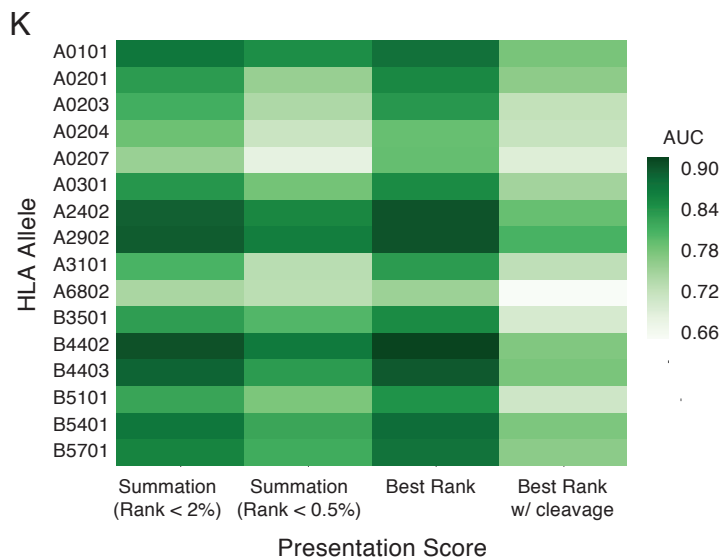

Supplement: NIHMS909948-supplement-8.pdf [file NIHMS909948-supplement-8.pdf]

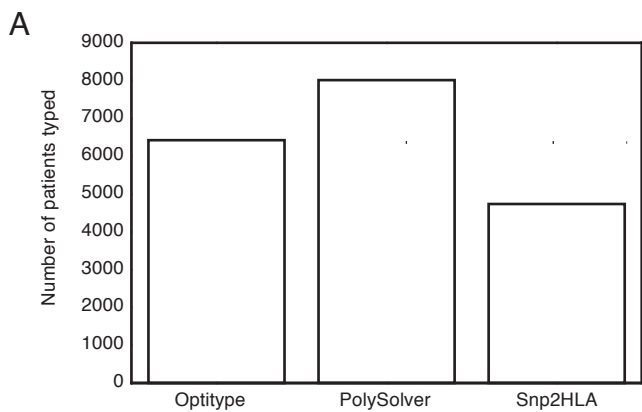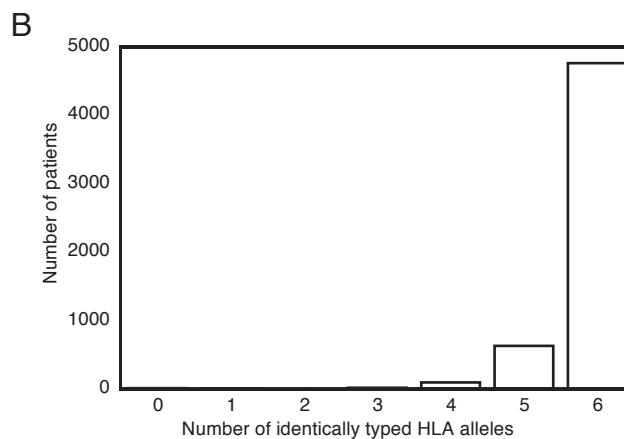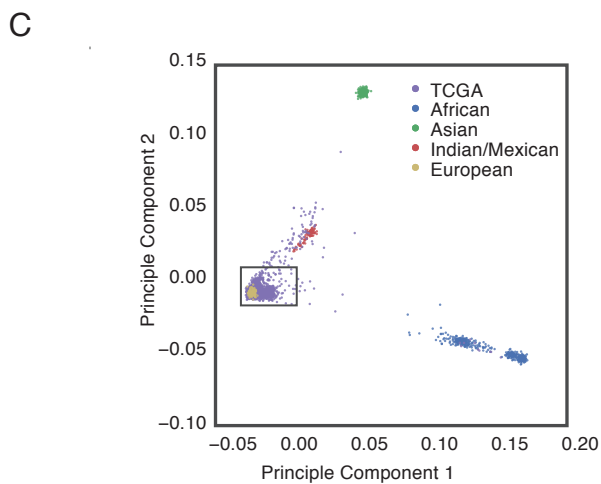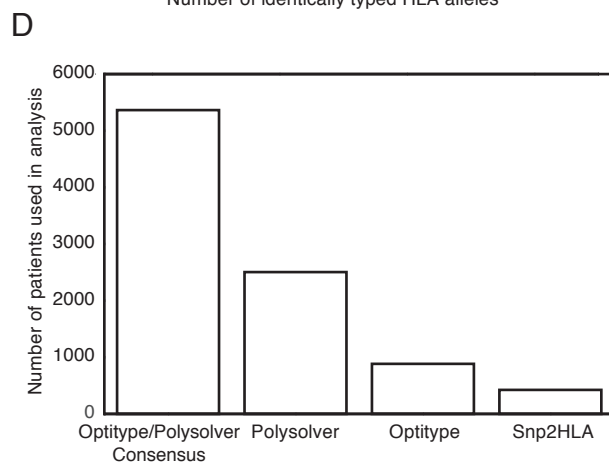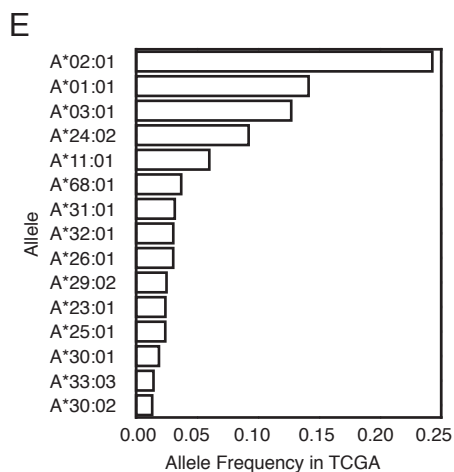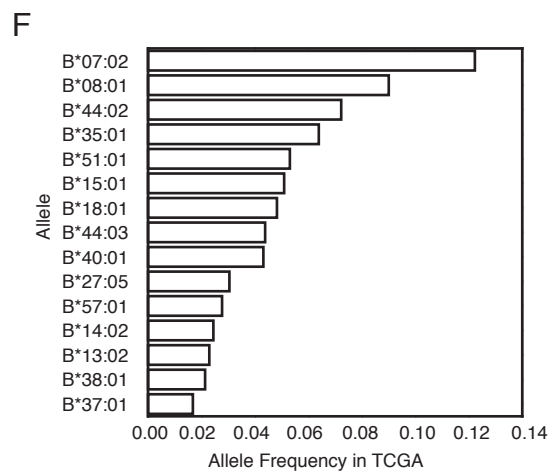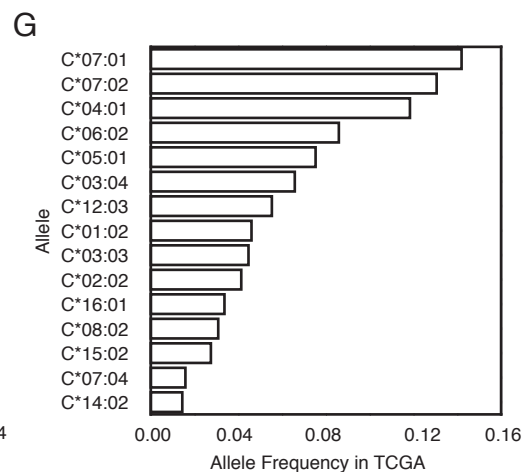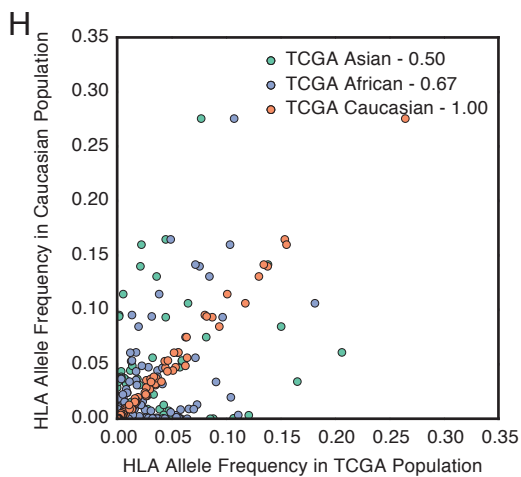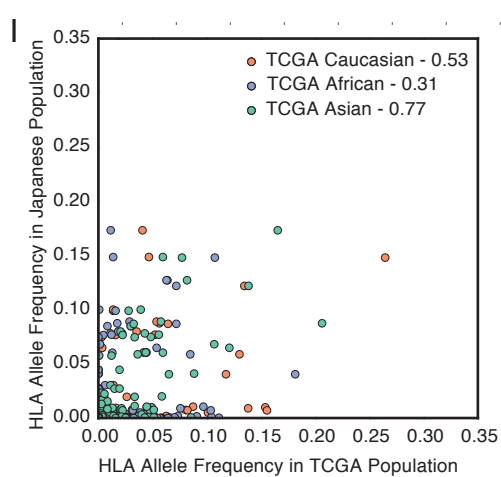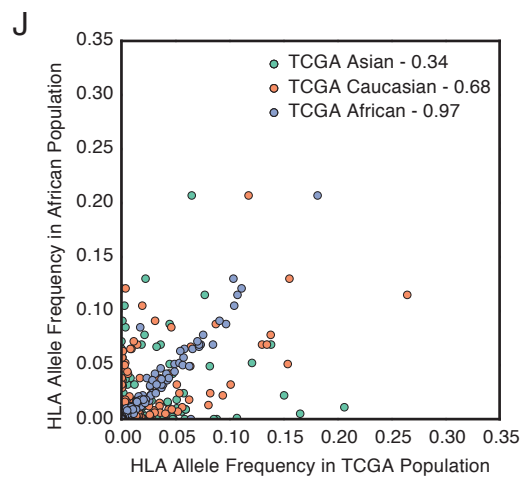

Supplement: NIHMS909948-supplement-9.pdf [file NIHMS909948-supplement-9.pdf]
